# Supplementary material for: Estrogen Receptor Status Could Modulate the Genomic Pattern in Familial and Sporadic Breast Cancer
Source: Oxford University Press journal article supplement (doi:10.1158/1078-0432.ccr-07-0711), 2007-12-15
Supplement: 10780432ccr070711-sup-supplementary_figures_s1-s2.pdf [file 10780432ccr070711-sup-supplementary_figures_s1-s2.pdf]

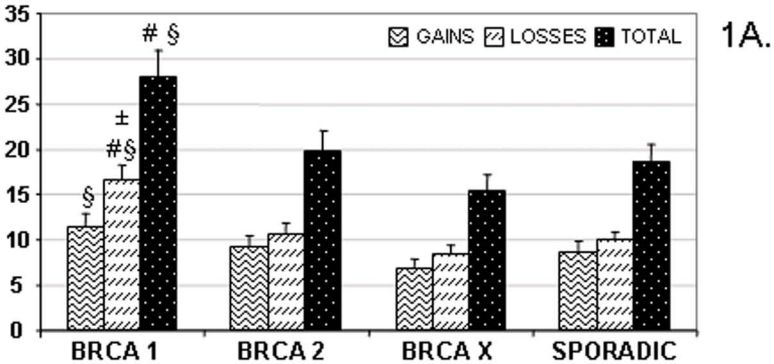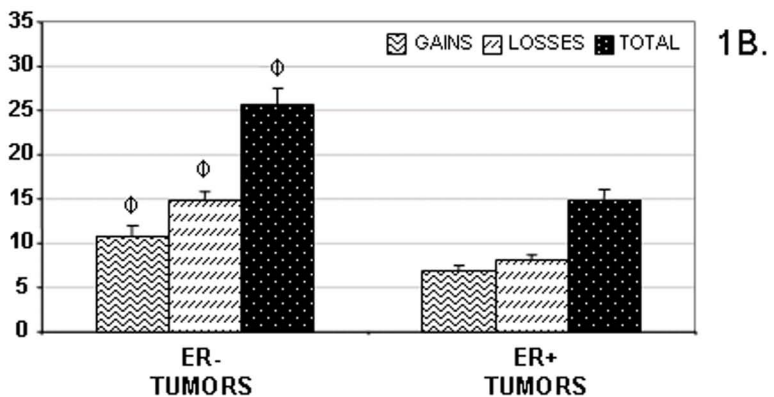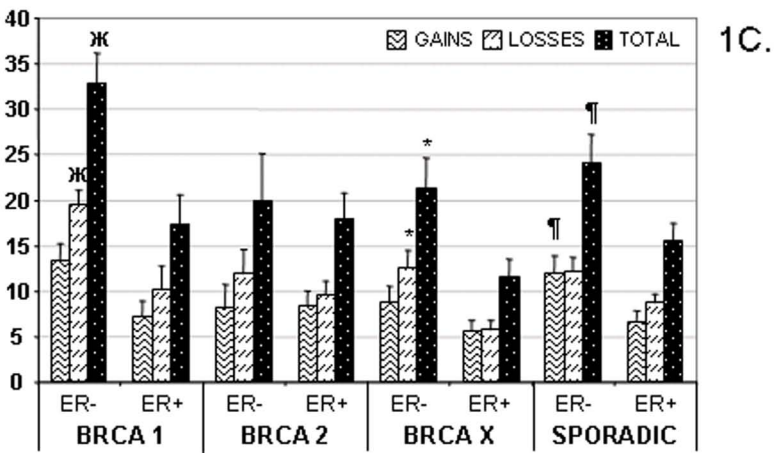

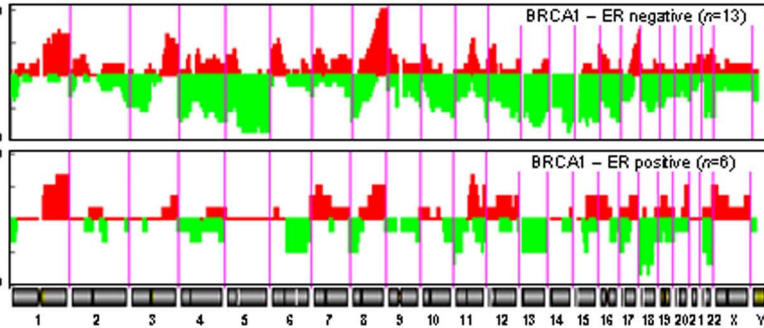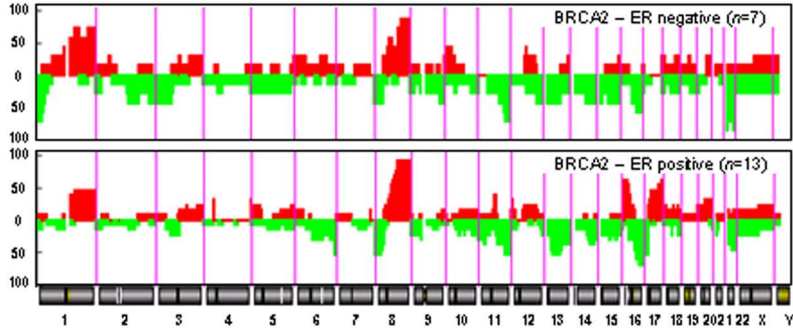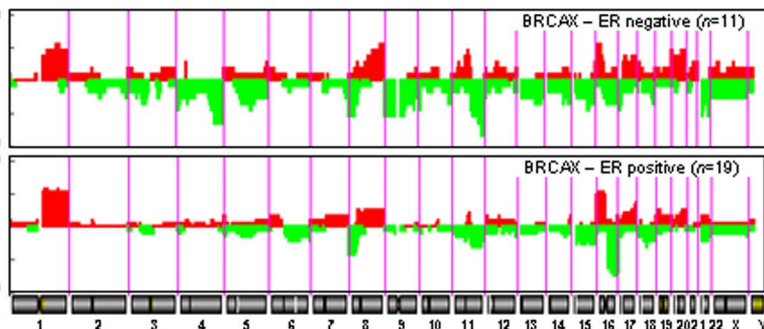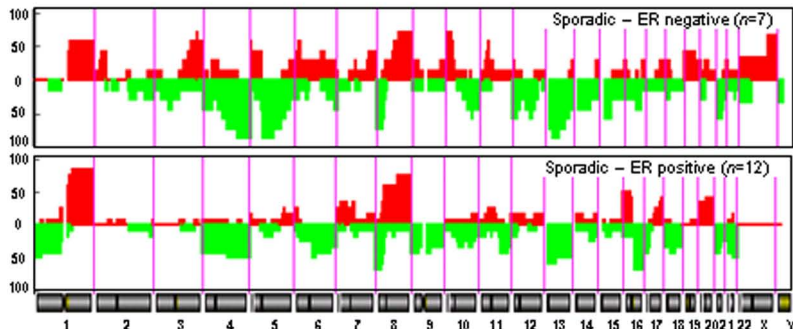

**Supplementary Figure S1.** Mean number of genomic alterations. A. *BRCA1*, *BRCA2*, BRCAX, and sporadic breast cancer. Significant differences ( $p$ -value<0.05 in U-Mann Whitney Test) are shown when comparing *BRCA1*- versus *BRCA2*-associated breast cancer ( $\pm$ ), *BRCA1* versus BRCAX (§), or *BRCA1* versus sporadic tumors (#). B. Samples divided according to their estrogen receptor status.  $\Phi$  means significant differences ( $p$ -value<0.05 in U-Mann Whitney Test). C. Tumors divided according to BRCA mutation, and further divided according to ER status. Significant differences ( $p$ -value<0.05 in U-Mann Whitney Test) are shown when comparing ER-negative vs ER-positive *BRCA1* tumors ( $\mathcal{K}$ ), ER-negative vs ER-positive BRCAX tumors (\*), and ER-negative vs ER-positive sporadic cancer ( $\mathcal{H}$ ).

**Supplementary Figure S2.** Overall genomic aberration frequencies in *BRCA1*, *BRCA2*, BRCAX and sporadic breast cancer samples subdivided by ER status. The frequency of gains is shown in red and the frequency of losses in green.
