# Supplementary material for: Estrogen Receptor Status Could Modulate the Genomic Pattern in Familial and Sporadic Breast Cancer
Source: Oxford University Press journal article supplement (doi:10.1158/1078-0432.ccr-07-0711), 2007-12-15
Supplement: 10780432ccr070711-sup-supplementary_table_s1.pdf [file 10780432ccr070711-sup-supplementary_table_s1.pdf]

**Supplementary Table S1.** Clinical and tumor characteristics of breast cancer cases.

| SAMPLE                                            |        | MUTATION         | AGE | TYPE OF INVASIVE CARCINOMA | HISTOLOGIC GRADE | ER STATUS |
|---------------------------------------------------|--------|------------------|-----|----------------------------|------------------|-----------|
| #                                                 | ID     |                  |     |                            |                  |           |
| <b>BRCA1 mutation positive</b>                    |        |                  |     |                            |                  |           |
| 1                                                 | 01T49  | E2 del185AG      | 46  | Intraductal                | 3                | -         |
| 2                                                 | 01T50  | E2 del185AG      | 48  | Intraductal                | 2                | -         |
| 3                                                 | 01T152 | E2 del185AG      | 43  | Intraductal                | 3                | -         |
| 4                                                 | 01T167 | E2 del185AG      | 32  | Intraductal                | 3                | -         |
| 5                                                 | 01T185 | E18 A1708E       | 38  | Intraductal                | 3                | -         |
| 6                                                 | 02T124 | E7 IVS7-1G/A     | 40  | Intraductal                | 3                | -         |
| 7                                                 | 03T5   | E11 ins3022TC    | 39  | Lobular                    | 2                | -         |
| 8                                                 | 03T158 | E2 del185AG      | 30  | Intraductal                | 3                | -         |
| 9                                                 | 03T159 | E2 del185AG      | 31  | Intraductal                | 3                | -         |
| 10                                                | 03T236 | E18 A1706E       | 40  | Intraductal                | 3                | -         |
| 11                                                | 03T325 | IVS 5+1G>4       | 28  | Intraductal                | 3                | -         |
| 12                                                | 03T331 | E3 243delA       | 59  | Intraductal                | 2                | -         |
| 13                                                | 04T39  | E18 IVS18-1G/A   | 28  | Intraductal                | 3                | -         |
| 14                                                | 01T157 | E2 del185AG      | 51  | Intraductal                | 3                | +         |
| 15                                                | 02T25  | E23 del5537A     | 43  | Intraductal                | 3                | +         |
| 16                                                | 02T345 | E2 del185AG      | NA  | Intraductal                | 3                | +         |
| 17                                                | 03T253 | E2 del185AG      | 34  | Intraductal                | 2                | +         |
| 18                                                | 03T326 | 5625 G>T         | 52  | Intraductal                | 3                | +         |
| 19                                                | 03T327 | 3598 del111pb    | 35  | Intraductal                | 3                | +         |
| <b>BRCA2 mutation positive</b>                    |        |                  |     |                            |                  |           |
| 20                                                | 01T153 | E11F 936delAAA   | 46  | Intraductal                | 3                | -         |
| 21                                                | 02T60  | E11 1089insT     | 50  | NA                         | 2                | -         |
| 22                                                | 03T162 | E11 1227delTG    | 51  | Intraductal                | 3                | -         |
| 23                                                | 03T163 | E11 K944stop     | 49  | Intraductal                | 3                | -         |
| 24                                                | 03T167 | E3 glu49stop     | 28  | Intraductal                | 2                | -         |
| 25                                                | 03T168 | E11 1308glu/stop | 46  | Intraductal                | 1                | -         |
| 26                                                | TB2765 | 4392delT         | 39  | Intraductal                | 3                | -         |
| 27                                                | 01T150 | E14 2370delAA    | 67  | Intraductal                | 3                | +         |
| 28                                                | 01T158 | E11F 936delAAA   | 34  | Intraductal                | 2                | +         |
| 29                                                | 02T16  | E18 8300insTT    | 45  | Lobular                    | 3                | +         |
| 30                                                | 02T17  | E10 1825delA     | 39  | Intraductal                | 3                | +         |
| 31                                                | 02T20  | E11 3492insT     | 44  | Intraductal                | 3                | +         |
| 32                                                | 02T23  | E11 3036del4     | 38  | Intraductal                | 2                | +         |
| 33                                                | 02T59  | E11 1089insT     | 36  | Intraductal                | 3                | +         |
| 34                                                | 02T123 | E10 605delG      | 30  | Intraductal                | 2                | +         |
| 35                                                | 03T238 | E18 2678insGA    | 37  | In situ                    | In situ          | +         |
| 36                                                | 03T322 | E 49 X           | 55  | Intraductal                | 1                | +         |
| 37                                                | TB2637 | 6503delTT        | 36  | Intraductal                | 3                | +         |
| 38                                                | TB2769 | W2586X           | 54  | Lobular                    | 3                | +         |
| 39                                                | TB2771 | W2586X           | 45  | Intraductal                | 3                | +         |
| 40                                                | TB2627 | 3917delC         | 38  | Lobular                    | NA               | NA        |
| 41                                                | TB2767 | 1133delC         | 45  | Intraductal                | NA               | NA        |
| 42                                                | TB2772 | 4397delT         | 39  | Intraductal                | NA               | NA        |
| 43                                                | TB2773 | 8219delT         | 39  | Lobular                    | NA               | NA        |
| <b>Familial BRCA1/2 mutation negative (BRCA1)</b> |        |                  |     |                            |                  |           |
| 44                                                | 01T6   | None             | 42  | Lobular                    | 3                | -         |
| 45                                                | 01T236 | None             | 39  | Intraductal                | 2                | -         |
| 46                                                | 01T238 | None             | 41  | Intraductal                | 1                | -         |
| 47                                                | 02T41  | None             | 34  | Intraductal                | 3                | -         |
| 48                                                | 02T47  | None             | 49  | Lobular                    | 2                | -         |
| 49                                                | 02T255 | None             | 51  | Intraductal                | 3                | -         |

|                 |        |      |    |             |         |    |
|-----------------|--------|------|----|-------------|---------|----|
| 50              | 02T342 | None | NA | Intraductal | 2       | -  |
| 51              | 04T34  | None | NA | Intraductal | 1       | -  |
| 52              | 04T35  | None | 45 | Intraductal | 1       | -  |
| 53              | 04T41  | None | 34 | Intraductal | 3       | -  |
| 54              | 04T55  | None | 46 | Intraductal | 1       | -  |
| 55              | 00T44  | None | 39 | Intraductal | 1       | +  |
| 56              | 00T55  | None | NA | Intraductal | 1       | +  |
| 57              | 01T197 | None | 43 | Intraductal | 1       | +  |
| 58              | 01T240 | None | NA | In situ     | In situ | +  |
| 59              | 01T242 | None | 54 | Intraductal | 2       | +  |
| 60              | 01T252 | None | 55 | Intraductal | 2       | +  |
| 61              | 01T264 | None | NA | Lobular     | 2       | +  |
| 62              | 01T306 | None | 44 | Intraductal | 1       | +  |
| 63              | 02T32  | None | 63 | Intraductal | 3       | +  |
| 64              | 02T33  | None | 30 | Intraductal | 1       | +  |
| 65              | 02T40  | None | 60 | Intraductal | 2       | +  |
| 66              | 03T165 | None | 43 | Intraductal | 1       | +  |
| 67              | 03T166 | None | 47 | Intraductal | 1       | +  |
| 68              | 03T270 | None | 52 | Intraductal | 1       | +  |
| 69              | 03T282 | None | 42 | Intraductal | 1       | +  |
| 70              | 03T317 | None | 35 | Intraductal | 1       | +  |
| 71              | 03T324 | None | 46 | Intraductal | 2       | +  |
| 72              | 04T42  | None | 45 | Intraductal | 3       | +  |
| 73              | 04T43  | None | 39 | In situ     | In situ | +  |
| 74              | 01T243 | None | 49 | Intraductal | 3       | NA |
| <b>Sporadic</b> |        |      |    |             |         |    |
| 75              | TB0001 | None | 51 | Intraductal | 3       | -  |
| 76              | TB0017 | None | 34 | Intraductal | 3       | -  |
| 77              | TB0022 | None | 69 | Intraductal | 2       | -  |
| 78              | TB0032 | None | 51 | Intraductal | 3       | -  |
| 79              | TB0041 | None | 50 | Intraductal | 3       | -  |
| 80              | TB0315 | None | 41 | Intraductal | 2       | -  |
| 81              | TB0493 | None | 52 | Intraductal | 3       | -  |
| 82              | TB0004 | None | 41 | Intraductal | 3       | +  |
| 83              | TB0010 | None | 50 | Intraductal | 3       | +  |
| 84              | TB0026 | None | 70 | Intraductal | 2       | +  |
| 85              | TB0031 | None | 54 | Intraductal | 3       | +  |
| 86              | TB0033 | None | 62 | Intraductal | 3       | +  |
| 87              | TB0038 | None | 52 | Lobular     | 2       | +  |
| 88              | TB0063 | None | 51 | Intraductal | 1       | +  |
| 89              | TB0314 | None | 60 | Intraductal | 3       | +  |
| 90              | TB0346 | None | 47 | Intraductal | 2       | +  |
| 91              | TB0369 | None | 36 | Intraductal | 2       | +  |
| 92              | TB0432 | None | 62 | Intraductal | 1       | +  |
| 93              | TB0476 | None | 74 | Intraductal | 2       | +  |

NA, not available information.

Estrogen receptor (ER) status was considered as positive when the percentage of stained cells was 10% or higher in a immunohistochemistry analysis.
