# Supplementary material for: Estrogen Receptor Status Could Modulate the Genomic Pattern in Familial and Sporadic Breast Cancer
Source: Oxford University Press journal article supplement (doi:10.1158/1078-0432.ccr-07-0711), 2007-12-15
Supplement: 10780432ccr070711-sup-supplementary_table_s3.pdf [file 10780432ccr070711-sup-supplementary_table_s3.pdf]

**Supplementary Table S3.** FISH validation in those available FFPE breast cancer samples that were standardized. Copy number variation was analyzed in two regions affected with Ar-CNV.

| SAMPLE # | BRCA | NAME   | 1p36        |            |      | 22q11-q12   |            |      |
|----------|------|--------|-------------|------------|------|-------------|------------|------|
|          |      |        | aCGH before | aCGH after | FISH | aCGH before | aCGH after | FISH |
| 1        | 1    | 01T49  | NC          | L          | L    | G           | L          | L    |
| 2        | 1    | 01T50  | G           | NC         | NC   | G           | NC         | NC   |
| 3        | 1    | 01T152 | G           | L          | L    | G           | L          | L    |
| 4        | 1    | 01T167 | G           | L          | L    | G           | L          | L    |
| 5        | 1    | 01T185 | G           | NC         | NC   | G           | NC         | NC   |
| 6        | 1    | 02T124 | G           | NC         | NV   | G           | G          | G    |
| 8        | 1    | 03T158 | G           | NC         | L    | G           | L          | L    |
| 10       | 1    | 03T236 | G           | NC         | L    | G           | G          | L    |
| 12       | 1    | 03T331 | G           | NC         | L    | L           | L          | L    |
| 13       | 1    | 04T39  | NC          | L          | L    | NC          | L          | L    |
| 15       | 1    | 02T25  | G           | NC         | NC   | G           | NC         | NC   |
| 16       | 1    | 02T345 | G           | L          | L    | G           | NC         | NC   |
| 17       | 1    | 03T253 | G           | NC         | NC   | G           | L          | L    |
| 18       | 1    | 03T326 | G           | NC         | NC   | NC          | L          | L    |
| 19       | 1    | 03T327 | G           | NC         | NC   | L           | L          | L    |
| 20       | 2    | 01T153 | G           | L          | L    | G           | G          | NV   |
| 21       | 2    | 02T60  | G           | L          | NV   | G           | L          | L    |
| 22       | 2    | 03T162 | G           | NC         | NC   | G           | G          | G    |
| 23       | 2    | 03T163 | G           | L          | L    | G           | L          | L    |
| 24       | 2    | 03T167 | NC          | L          | L    | G           | L          | L    |
| 25       | 2    | 03T168 | G           | L          | L    | G           | L          | L    |
| 29       | 2    | 02T16  | G           | NC         | NC   | G           | NC         | L    |
| 30       | 2    | 02T17  | G           | NC         | L    | G           | L          | L    |
| 33       | 2    | 02T59  | G           | L          | L    | G           | G          | G    |
| 34       | 2    | 02T123 | G           | NC         | NC   | L           | L          | L    |
| 36       | 2    | 03T322 | G           | NC         | NC   | G           | L          | L    |
| 44       | X    | 01T6   | L           | L          | L    | G           | L          | L    |
| 46       | X    | 01T238 | G           | NC         | NC   | NC          | L          | L    |
| 49       | X    | 02T255 | G           | NC         | NC   | G           | L          | NC   |
| 51       | X    | 04T34  | NC          | NC         | NV   | NC          | L          | NC   |
| 52       | X    | 04T35  | G           | NC         | NC   | G           | NC         | NC   |
| 58       | X    | 01T240 | G           | NC         | NC   | L           | L          | L    |
| 61       | X    | 01T264 | G           | NC         | NC   | G           | NC         | L    |
| 63       | X    | 02T32  | G           | NC         | NV   | G           | L          | L    |
| 64       | X    | 02T33  | G           | NC         | NV   | G           | G          | L    |
| 66       | X    | 03T165 | G           | NC         | NC   | G           | NC         | L    |
| 67       | X    | 03T166 | G           | NC         | NV   | G           | NC         | NC   |
| 68       | X    | 03T270 | G           | NC         | NC   | G           | NC         | NC   |
| 72       | X    | 04T42  | G           | G          | L    | NC          | NC         | NC   |
| 73       | X    | 04T43  | G           | NC         | L    | G           | NC         | NC   |

The copy number variation was measured by aCGH before and after the standardization, and contrasted to the one provided by FISH experiments. NC, no change. G, gain. L, loss. NV, not valuable. A closer correlation aCGH-FISH data was clearly found after standardization, showing a dramatic increase in confirmed aberrations (9% before to 82% after standardization).
